# Supplementary material for: Development of flexible Zn/MnO2 secondary batteries using a fumed silica-doped hydrogel electrolyte
Source: Royal Society of Chemistry journal article supplement (doi:10.1039/d4ra06602b), 2024-01-01
Supplement: d4ra06602b1.pdf [file d4ra06602b1.pdf]

## Supporting information

### Enabling flexible Zn/MnO<sub>2</sub> secondary batteries by fumed silica-doped hydrogel electrolyte

Wenlong Xiong<sup>a,c</sup>, Qiyuan Xie<sup>a</sup>, Haoran Zhang<sup>a</sup>, Chenjie Zhu<sup>b,\*</sup>, Md Asraful Alam<sup>a</sup>,

Lele Wang<sup>a</sup>, Jingliang Xu<sup>a,c,\*</sup>

<sup>a</sup> *State Key Laboratory of Biobased Transportation Fuel Technology, School of Chemical Engineering, Zhengzhou University, Zhengzhou 450001, PR China*

<sup>b</sup> *College of Biotechnology and Pharmaceutical Engineering, Nanjing Tech University, Nanjing 211816, PR China*

<sup>c</sup> *Henan Center for Outstanding Overseas Scientists*

\*Corresponding authors: State Key Laboratory of Biobased Transportation Fuel Technology, School of Chemical Engineering, Zhengzhou University, Zhengzhou 450001, PR China.

E-mail address: [zhucj@njtech.edu.cn](mailto:zhucj@njtech.edu.cn) (Chenjie Zhu); [xujl@zzu.edu.cn](mailto:xujl@zzu.edu.cn) (Jingliang Xu)

Phone: +8613083608578; +8613580316368

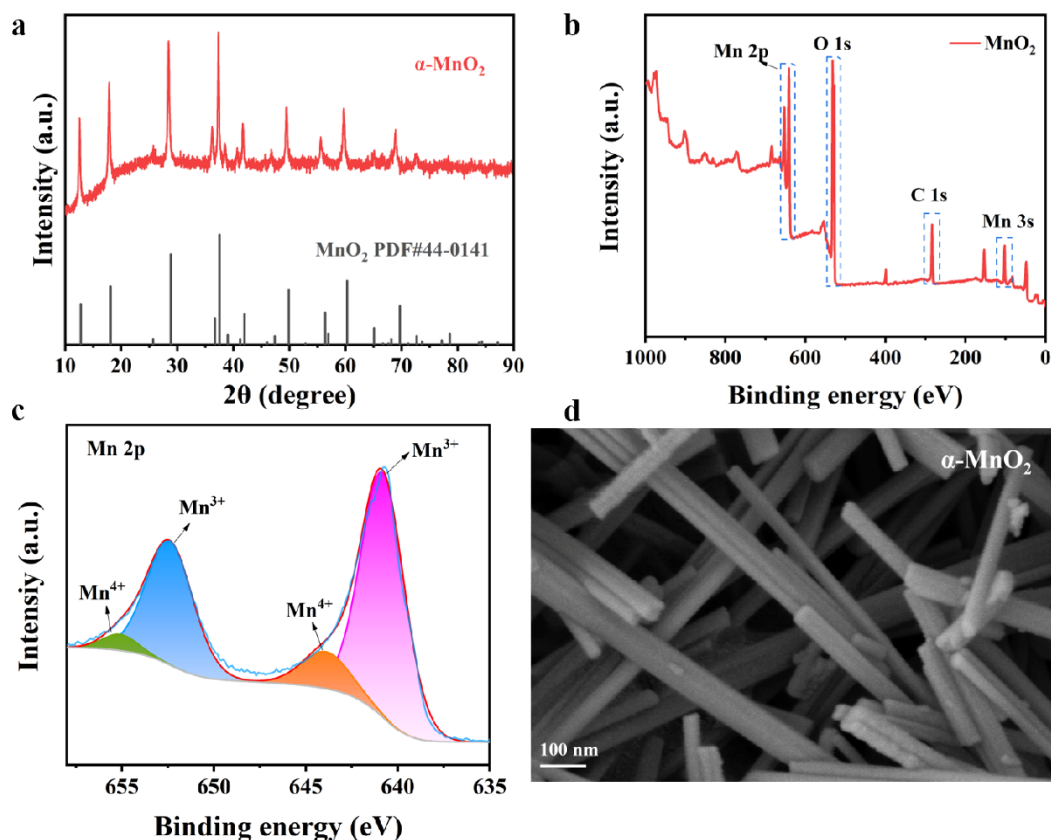

**Fig. S1** (a) XRD pattern of  $\alpha$ -MnO<sub>2</sub>. (b) XPS spectrum of  $\alpha$ -MnO<sub>2</sub>. (c) Mn 2p XPS spectrum. (d) SEM image of  $\alpha$ -MnO<sub>2</sub>.

Fig. S1a shows the XRD pattern of the prepared  $\alpha$ -MnO<sub>2</sub>. The diffraction peaks appeared at 13, 18, 29, 37, 42, 50, 56, 60, and 69° are corresponding to the (110), (200), (310), (211), (301), (411), (600), (521), and (541) crystal planes in the  $\alpha$ -MnO<sub>2</sub> standard card (PDF# 44-0141). As shown in Fig. S1b, Mn, O, and C coexist on the surface of the prepared  $\alpha$ -MnO<sub>2</sub>. For Mn element, peaks near 641.1 and 652.6 eV are attributed to Mn<sup>3+</sup>, while peaks near 643.8 and 655.2 eV can be attributed to Mn<sup>4+</sup> (Fig. S1c).<sup>1,2</sup> The SEM image shows that the morphology of the prepared MnO<sub>2</sub> is mostly nanowires and a few are nanorods (Fig. S1d), which is also consistent with the structural characteristics of the reported tunnel type  $\alpha$ -MnO<sub>2</sub>.<sup>3-5</sup> The  $\alpha$ -MnO<sub>2</sub> was synthesized according to the XRD, XPS, and SEM analyses.

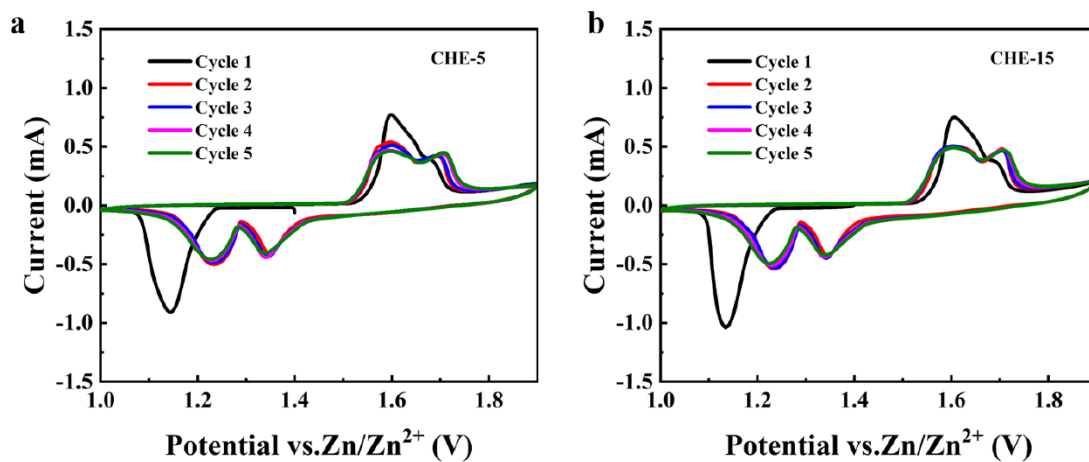

**Fig. S2** Cyclic voltammograms of batteries using (a) CHE-5 and (b) CHE-15 from the 1<sup>st</sup> to 5<sup>th</sup> scan respectively

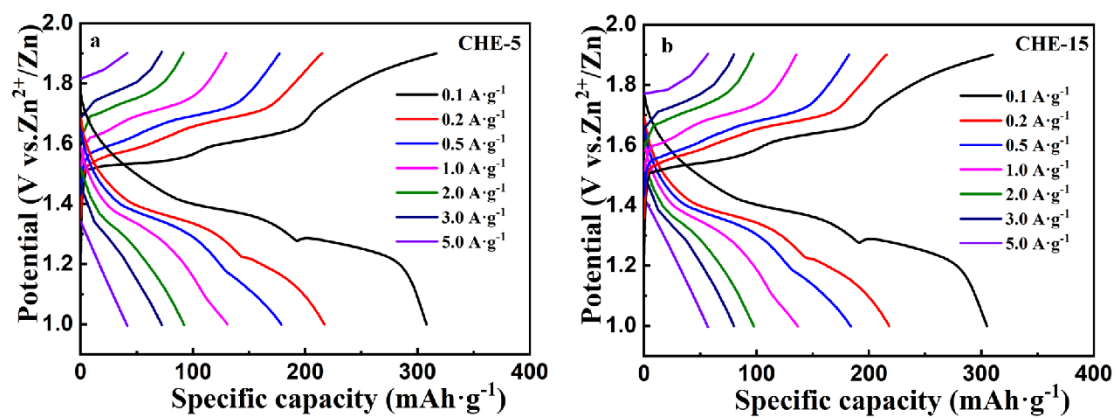

Fig. S3 Charge/discharge profiles of the batteries using (a) CHE-5 and (b) CHE-15

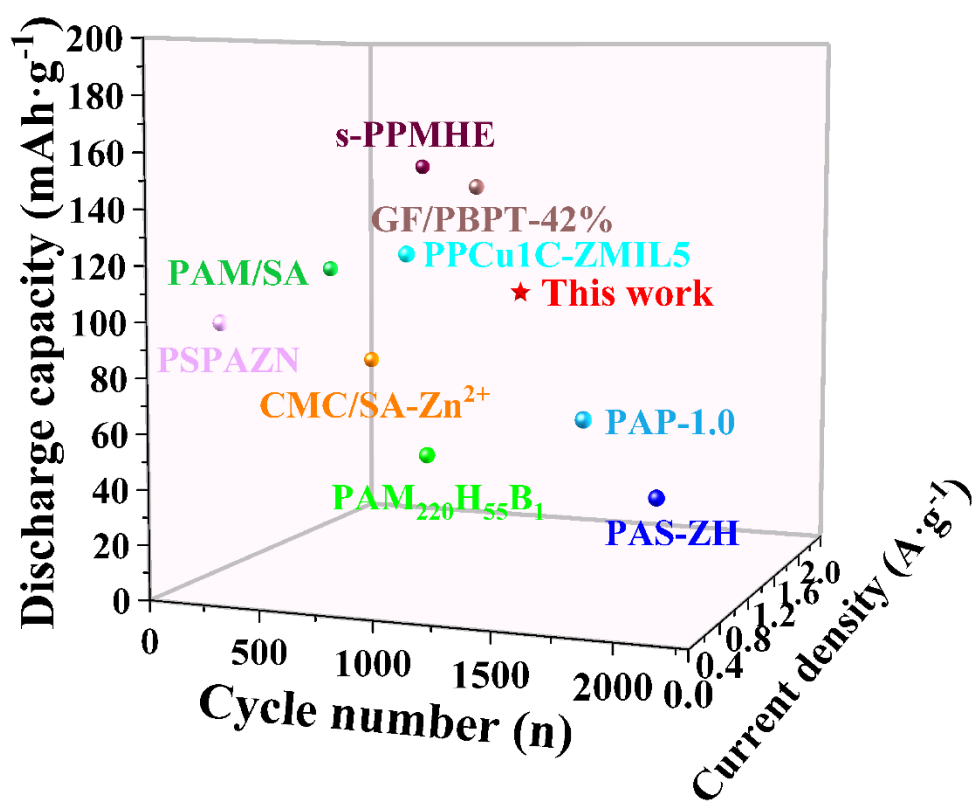

Fig. S4 Comparison of the cycle performance of Zn//MnO<sub>2</sub> battery in this work with recently reported hydrogel electrolyte-based Zn//MnO<sub>2</sub> batteries

**Table S1** Comparison of mechanical properties of hydrogel electrolytes

| Hydrogel<br>Electrolyte | Tensile stress<br>(MPa) | Tensile strain<br>(%) | References |
|-------------------------|-------------------------|-----------------------|------------|
| CSC                     | 0.0542                  | 160                   | 6          |
| Gel/SA-acetate          | 0.3                     | 500                   | 7          |
| PZD-20%                 | 0.082                   | 690                   | 8          |
| HE-RS                   | 0.02                    | 273                   | 9          |
| PNMA-SA                 | 0.838                   | 200                   | 10         |
| PZDHE                   | 0.796                   | 450                   | 11         |
| PAZPM                   | 0.1                     | 320                   | 12         |
| CHE-10                  | 2.55                    | 465                   | This work  |

**Table S2** Comparison of the cycle performance of Zn//MnO<sub>2</sub> battery in this work with recently reported hydrogel electrolyte-based Zn//MnO<sub>2</sub> batteries

| Hydrogel Electrolyte                              | Current density (A·g <sup>-1</sup> ) | Discharge capacity (mAh·g <sup>-1</sup> ) | Cycle number (n) | References |
|---------------------------------------------------|--------------------------------------|-------------------------------------------|------------------|------------|
| GF/PBPT-42%                                       | 1                                    | 145                                       | 1000             | 13         |
| PAM/SA                                            | 1                                    | 112                                       | 300              | 14         |
| PAM <sub>220</sub> H <sub>55</sub> B <sub>1</sub> | 0.5                                  | 50                                        | 1000             | 15         |
| s-PPMHE                                           | 1.525                                | 150                                       | 500              | 16         |
| PAS-ZH                                            | 0.5                                  | 40                                        | 2000             | 17         |
| PAP-1.0                                           | 0.2                                  | 71                                        | 1800             | 18         |
| CMC/SA-Zn <sup>2+</sup>                           | 1                                    | 77                                        | 500              | 19         |
| PPCu1C-ZMIL5                                      | 0.308                                | 124.6                                     | 1000             | 20         |
| PSPA <sub>Zn</sub>                                | 0.2                                  | 98.6                                      | 220              | 21         |
| CHE-10                                            | 1.5                                  | 100.5                                     | 1000             | This work  |

## References

1. M. Karbak, M. Baazizi, S. Sayah, C. Lambert, Y. Tison, H. Martinez, T. Chafik and F. Ghamouss, *J. Mater. Chem. A*, 2023, 11, 2634–2640.
2. Y. Liu, K. Xiang, W. Zhou, W. Deng, H. Zhu and H. Chen, *Small*, 2023, 20, 2308741.
3. X. Xiao, L. Zhang, W. Xin, M. Yang, Y. Geng, M. Niu, H. Zhang and Z. Zhu, *Small*, 2024, 20, 2309271.
4. X. Tian, X. Cheng, S. Liao, J. Chen, P. Lv and Q. Wei, *ACS Appl. Mater. Interfaces*, 2023, 15, 52415–52426.
5. Y. Li, Y. Li, Q. Liu, Y. Liu, T. Wang, M. Cui, Y. Ding, H. Li and G. Yu, *Angew. Chem.-Int. Edit.*, 2024, 63, e202318444.
6. Y. Hu, Z. Wang, Y. Li, P. Liu, X. Liu, G. Liang, D. Zhang, X. Fan, Z. Lu and W. Wang, *Chem. Eng. J.*, 2024, 479, 147762.
7. C. Tian, J. Wang, R. Sun, T. Ali, H. Wang, B. Xie, Y. Zhong and Y. Hu, *Angew. Chem.-Int. Edit.*, 2023, 62, e202310970.
8. J. Zhang, C. Lin, L. Zeng, H. Lin, L. He, F. Xiao, L. Luo, P. Xiong, X. Yang, Q. Chen and Q. Qian, *Small*, 2024, 20, 2312116.
9. H. Tian, M. Yao, Y. Guo, Z. Wang, D. Xu, W. Pan and Q. Zhang, *Adv. Energy Mater.*, 2024, 2403683.
10. W. Zeng, S. Zhang, J. Lan, Y. Lv, G. Zhu, H. Huang, W. Lv and Y. Zhu, *ACS Nano*, 2024, 18, 26391–26400.



11. M. Shi, J. Zhang, G. Tang, B. Wang, S. Wang, X. Ren, G. Li, W. Chen, C. Liu and C. Shen, *Nano Res.*, 2024, 17, 5278–5287.
12. K. Zhu, X. Niu, W. Xie, H. Yang, W. Jiang, M. Ma and W. Yang, *Energy Environ. Sci.*, 2024, 17, 4126–4136.
13. X. Liu, W. Wei, Y. Yang, Y. Li, Y. Li, S. Xu, Y. Dong and R. He, *Chem. Eng. J.*, 2022, 437, 135409.
14. Z. Xiang, Y. Li, X. Cheng, C. Yang, K. Wang, Q. Zhang and L. Wang, *Chem. Eng. J.*, 2024, 490, 151524.
15. X. Wan, Q. Xie, H. Song, C. Li and J. Wang, *J. Membr. Sci.*, 2022, 655, 120606.
16. M. Sun, G. Ji and J. Zheng, *Chem. Eng. J.*, 2023, 463, 142535.
17. G. Liu, Y. Peng, M. Yu, L. Zhao, Y. Fu, J. Zhang, H. Zeng, R. Liu, S. Niu, Y. Meng and F. Ran, *J. Power Sources*, 2024, 621, 235280.
18. G. Ji, M. Sun, M. Li, R. Hu and J. Zheng, *J. Power Sources*, 2024, 612, 234823.
19. Y. Yang, L. Shi, Y. Wu, Z. Chen, X. Zhu, L. Du and Y. Wang, *Chem. Eng. J.*, 2024, 484, 149780.
20. J. Hu, Y. Qu, F. Shi, J. Wang, X. He, S. Liao and L. Duan, *Adv. Funct. Mater.*, 2022, 32, 2209463.
21. F. Yang, H. Hua, P. Lai, P. Lin, J. Yang, M. Zhang, Y. Yang and J. Zhao, *ACS Appl. Energ. Mater.*, 2022, 5, 10872–10882.
